# Supplementary material
Source: HighWire-hosted journal article supplement (https://bmjopen.bmj.com/content/14/12/e087015)
Supplement: inline-supplementary-material-2 [file inline-supplementary-material-2.pdf]

Table S1. The characteristics of included studies

| Author(s)/year developed | Country | Type of study | Participants      |             |         | Study aims | Key findings and conclusions |
|--------------------------|---------|---------------|-------------------|-------------|---------|------------|------------------------------|
|                          |         |               | Target population | Sample size | Setting |            |                              |
|                          |         |               |                   |             |         |            |                              |
|                          |         |               |                   |             |         |            |                              |
|                          |         |               |                   |             |         |            |                              |
|                          |         |               |                   |             |         |            |                              |
|                          |         |               |                   |             |         |            |                              |

Table S2. The extra characteristics of included studies

| Author(s)/year developed | intervention strategies |                     |                  |                  |                                 |                |                  | outcomes measured | outcome assessment methods/measurement instruments |
|--------------------------|-------------------------|---------------------|------------------|------------------|---------------------------------|----------------|------------------|-------------------|----------------------------------------------------|
|                          | teaching modalities     | teaching objectives | teaching content | teaching methods | teaching duration and frequency | teaching media | teaching faculty |                   |                                                    |
|                          |                         |                     |                  |                  |                                 |                |                  |                   |                                                    |
|                          |                         |                     |                  |                  |                                 |                |                  |                   |                                                    |
|                          |                         |                     |                  |                  |                                 |                |                  |                   |                                                    |
|                          |                         |                     |                  |                  |                                 |                |                  |                   |                                                    |
|                          |                         |                     |                  |                  |                                 |                |                  |                   |                                                    |
